# Supplementary material for: Wind variability in the Canary Current during the last 70 years
Source: Copernicus journal article supplement (doi:10.5194/os-2020-18), 2020-03-25
Supplement: Supplementary file [file os-2020-18-RC3-supplement.pdf]

## Review of « Wind variability in the Canary Current during the last 70 years»

### **General Comments :**

The authors have tried to analyze the long term trend of the wind intensity with respect to the climatic indices mainly NAO and AMO.

In this *short paper*, various analyses have been done in various ways to investigate factors controlling the wind changes patterns along the Canary Archipelagos. There may be interesting findings, it discusses an aspect which is already very controversial, it is the Bakun hypothesis which stipulates an acceleration of the wind and intensifies the upwelling.

### **Main comments:**

Regardless of whether the paper is accepted or not, I have two concerns:

1- The use of CCMP data is very doubtful since the series before 2009 date of the injection of QUIKSCAT data (1999-2009) in the variational analysis underestimates the intensity of the winds and overestimates the wind after 1999.

In this context, and to be able to conclude on the trend, the authors have to use other data sources, especially ASCAT, although the series is short, but it allows to validate or correct the data series.

2- The use of such a long time series would undoubtedly reveal a periodicity in the variability of the wind, could you calculate or estimate the duration of the periods of high intensities and those of low intensities.
